1 **SARS-CoV-2 infection of BNT162b2(mRNA)-vaccinated individuals is not restricted to**  
2 **variants of concern or high-risk exposure environments**

3  
4 Brittany Rife Magalis 1,2, Carla Mavian 1,2, Massimiliano Tagliamonte 1,2, Shannan N. Rich  
5 1,3,4, Melanie Cash 1,2, Alberto Riva 5, Julia C. Loeb 1,6, Michael Norris 1,6, David Moraga  
6 Amador 5, Yanping Zhang 5, Jerne Shapiro 3,4, Petr Starostik 2, Simone Marini 1,3, Paul Myers  
7 4, David Ostrov 2, John A. Lednicky 1,6, J. John Glenn Morris Jr. 1, Michael Lauzardo 1,4,7,  
8 Marco Salemi 1,2,<sup>§</sup>

9  
10 1Emerging Pathogens Institute, University of Florida, Gainesville, FL, USA, 32610  
11 2Department of Pathology, University of Florida, Gainesville, FL, USA, 32610  
12 3Department of Epidemiology, College of Public Health and Health Professions and College of  
13 Medicine, University of Florida, Gainesville, FL, USA, 32610  
14 4Florida Department of Health, Alachua County, Gainesville, FL, USA, 32641  
15 5Interdisciplinary Center for Biotechnology Research, University of Florida, Gainesville, FL,  
16 USA, 32610  
17 6Department of Environmental and Global Health, University of Florida, Gainesville, Florida  
18 32610  
19 7Division of Infectious Diseases and Global Medicine, College of Medicine, University of Florida,  
20 Gainesville, FL, USA, 32610

21  
22 <sup>§</sup>Corresponding author

23 **Abstract**

24 The emergence of SARS-CoV-2 variants of concern (VOC) has raised questions regarding the  
25 extent of protection of currently implemented vaccines. Ten “vaccination breakthrough”  
26 infections were identified in Alachua County, Florida, among individuals fully vaccinated with the

27 BNT162b2 mRNA vaccine as a result of social or household transmission. Eight individuals  
28 presented mild symptoms in the absence of infection with other common respiratory viruses,  
29 confirmed using viral genetic sequencing. SARS-CoV-2 genomes were successfully generated  
30 for five of the vaccine breakthroughs and 399 individuals in the surrounding area and were  
31 included for reference-based phylogenetic investigation. These five individuals were  
32 characterized by infection with both VOCs and low-frequency variants present within the  
33 surrounding population. Mutations, in the Spike glycoprotein, were consistent with their  
34 respective circulating lineages. However, we detected an additional mutation in Spike's N-  
35 terminal domain of a B.1.1.7 strain, present at low-frequency (~1%) in the unvaccinated  
36 population, potentially affecting protein's stability and functionality. The findings highlight the  
37 critical need for continued testing and monitoring of infection among individuals regardless of  
38 vaccination status.

39  
40 Several rapidly spreading variants of severe acute respiratory syndrome coronavirus 2 (SARS-  
41 CoV-2) have risen to the status of "variants of concern" (VOC), according to the Centers for  
42 Disease Control (CDC, [https://www.cdc.gov/coronavirus/2019-ncov/cases-updates/variant-](https://www.cdc.gov/coronavirus/2019-ncov/cases-updates/variant-surveillance/variant-info.html)  
43 [surveillance/variant-info.html](https://www.cdc.gov/coronavirus/2019-ncov/cases-updates/variant-surveillance/variant-info.html)), accumulating as many as 17 unique genomic mutations with  
44 respect to the original viral strain originating from the Wuhan province of China (1). These VOCs  
45 include the lineages most notably defined by their area of origin, such as the United Kingdom  
46 (UK). The UK VOC, also referred to as the B.1.1.7 lineage using the Pango nomenclature (2),  
47 emerged in September of 2020 in Kent, UK, but quickly made its way to the United States (US,  
48 (3)). More recently, the B.1.427/B.1.429 lineages, two forms collectively dubbed the "California  
49 variant", were added to the CDC's list of VOCs, as they have spread widely since their initial  
50 detection in July of 2020 in Los Angeles County, California (4). The emergence of these and  
51 other VOCs, and their level of evolutionary divergence from the original strain, has raised  
52 questions regarding the extent of protection of currently implemented vaccines against infection

53 (5-8). Here, we report epidemiological and genomic data (where available) for vaccination  
54 breakthrough cases from Alachua County, Florida, in the context of the diverse SARS-CoV-2  
55 epidemic in Florida and the remaining US.

56

## 57 **Results**

58 From January to March 2021, Alachua County, Florida, experienced a reduced number of  
59 infections (~11% drop in % positive cases), with a general increase in number of vaccinations,  
60 particularly since the last week of February (**Figure S1**). Regardless of the reduced coronavirus  
61 disease (COVID-19) burden in the county, continued testing of vaccinated individuals has  
62 provided insight into susceptibility of vaccines to circulating viral variants within the region.

63 Between February and March 2021, ten individuals enrolled in the UF Health Screen, Test &  
64 Protect (STP) program (**online Methods**) tested positive using the standard polymerase chain  
65 reaction (PCR)-based assay for SARS-CoV-2 infection after completing the BNT162b2 mRNA  
66 two-dose vaccine series (9). Individuals were considered fully vaccinated two weeks after their  
67 second vaccination in a 2-dose series. By March 17, 2021, more than 59,000 individuals were  
68 vaccinated with at least one dose of one of Pfizer (49%), Moderna (49%), or Johnson &  
69 Johnson (2%) vaccines in Alachua County, Florida (10). The number of infections among  
70 vaccinated individuals suggests a relatively low breakthrough rate consistent with the high  
71 efficacy of Pfizer's BNT162b2 vaccine demonstrated in clinical trials (9), though it is important to  
72 acknowledge the small sample size of this study and potential sampling biases incorporated in  
73 the STP program that limit drawing any conclusions regarding validation of efficacy (**online**  
74 **Methods**). The ten "vaccine-breakthrough" individuals were all identified within 27-47  
75 (mean=37.6) days following the second dose, eight of which presented with symptoms  
76 characteristic of COVID-19 (**Tables 1 and S1**). The majority of these individuals identified as  
77 female (90%), White (80%), under the age of 35 (mean=34), and reported their occupation as

78 healthcare-related (80%), including students working in patient care. Contact tracing revealed  
79 that seven of these individuals had exposures to individuals previously identified as COVID-19  
80 cases in the two weeks prior to their disease onset, with four reporting the nature of the  
81 relationship as household and three as community/social. None of the individuals reported  
82 exposure in the workplace. So, despite healthcare workers increased risk of exposure, infection  
83 in these individuals was likely the result of inadvertent exposure during social contact.

84  
85 Secondary saliva samples were collected from the ten vaccine-breakthrough individuals within  
86 3-7 days of testing positive for infection (**Tables 1** and **S1**). Saliva collection was used in this  
87 study for the isolation of viral RNA, as this bodily fluid has demonstrated prolonged presence of  
88 viral RNA (up to 25 days post-symptom onset, (11)), irrespective of disease severity (12). The  
89 research protocol (**online Methods**) was approved by the University of Florida institutional  
90 review board. SARS-CoV-2 full-genome (>70%) sequences were successfully generated for  
91 five of the vaccinated individuals. A panel of additional respiratory viruses was also targeted  
92 during sequencing (**Table S2**), confirming the absence in all patients of additional infection with  
93 common viruses, such as influenza. Thus, clinical symptoms, when present, were likely the  
94 result of productive coronavirus infection. The reason for insufficient SARS-CoV-2 genome  
95 quality for five of the vaccine breakthrough cases is not fully clear. Results from COVID-19  
96 testing for the majority of these individuals were limited to qualitative data (positive or negative),  
97 though the number of PCR cycles (Cq) required for reliable viral RNA amplification for two of the  
98 individuals were provided and already >25 at the time of diagnosis (**Table S3**), which has been  
99 considered relatively high for genomic sequencing (13). Given the time between diagnosis and  
100 saliva sampling (**Table S1**), saliva viral load may have been too low for the genomic  
101 amplification required for amplicon-based sequencing for some individuals. While mutations in  
102 primer-binding regions can reduce genome coverage for amplicon-based sequencing (13),

103 coverage mapping did not indicate this phenomenon – alternating regions of high- and low-  
104 coverage were not observed (**Figure S2**). Two of these individuals were, however,  
105 asymptomatic whereas asymptomatic individuals were not found among the successful full-  
106 genome sequences (**Table S2**), supporting the link between severity of symptoms and rapidity  
107 of viral clearance (14).

108  
109 In order to understand the context of the vaccine breakthrough infections, we assembled a full-  
110 genome sequence dataset (n=3902) including sequences generated from hospital samples in  
111 Alachua County between January-March 2021 (n=399), all Floridian sequences (n=3,016)  
112 deposited into the GISAID database (<https://gisaid.org>), and epidemiologically relevant  
113 sequences from the global population (also from GISAID). Epidemiological relevance was  
114 defined on an individual sequence basis, restricting the global GISAID search to the two  
115 sequences most similar genetically to each Floridian sequence and sampled within a high-  
116 confidence transmission time window (30 days) based on sample collection date. Additional  
117 details on this method (termed “FLACO-BLAST”) can be found in the **online Methods** and (15),  
118 and the script is available from <https://github.com/salemilab/flaco>. GISAID IDs and  
119 corresponding submission information are provided in **Table S4**. Owing to low genetic  
120 variability, as well as potentially shared epidemiological linkages, sequences retrieved from  
121 GISAID were often shared by more than one query (Florida) sequence, resulting in a total of  
122 482 non-Floridian sequences, all of which were located within the US. The resulting dataset  
123 spanned October 10, 2020 to March 17, 2021.

124  
125 Lineages for all sequences were determined using the PangoLEARN model (Pangolin v 2.3.6),  
126 which was trained using ~60,000 GISAID SARS-CoV-2 sequences to classify incoming  
127 sequences based on molecular and epidemiological criteria (2). The full dataset in this study  
128 was characterized by a total of 106 lineages, for which only nine (B.1.X) lineages

129 represented >99% of samples (**Figure 1A**). The distribution of lineages for Floridian sequences  
130 outside of Alachua County largely resembled that of the non-Floridian reference sequences, as  
131 expected given the filtering approach for genetic similarity described above; the exception to this  
132 similarity was the presence of the B.1.375 lineage within the Florida dataset, which was not  
133 present among reference sequences (**Figure 1A**). As this lineage was not observed among the  
134 Alachua County sequences, further investigation into the potential misclassification of these  
135 sequences as the B.1.375 lineage, more notably associated with the northern states (16), was  
136 considered outside the scope of this study. Whereas both the Alachua County and remaining  
137 Floridian samples were dominated by the B.1.234 lineage in November 2020, both regions  
138 quickly expanded to include at least seven other lineages by mid-January 2021 (**Figure 1A**).  
139 This expansion included a growing presence of the B.1.1.7 (or UK VOC) and B.1.427 (California  
140 VOC) lineages (**Figure 1A**). Given the growth in the UK and California variants within the  
141 Florida population, it is not surprising that three of the vaccinated individuals reported in this  
142 study were determined to belong to these VOCs – 1 B.1.1.7 and 2 B.1.247/B.1.249. The  
143 remaining two vaccinated individuals, however, presented with the high-frequency (~16%) B.1  
144 lineage and low-frequency (<1%) B.1.377 lineage, neither of which is considered a VOC.

145

146 Following lineage classification, a maximum likelihood phylogenetic tree was reconstructed from  
147 the sequences in order to verify lineage classification and to determine relationships among  
148 vaccinated individuals in the context of geographical and temporal information (**Figure 1B**).  
149 Bootstrap replicates for the sequence data were used to provide support for branching patterns  
150 within the tree (17-19), and the smallest (number of sequences), well-supported (>90% of  
151 replicates) clade involving each vaccination-breakthrough case was examined individually.  
152 Whereas four of the five successfully sequenced, vaccinated individuals belonged to relatively  
153 small, definable clades (**Figure 1C-D**), reliable placement of the fifth B.1-lineage individual  
154 within the tree could not be obtained, despite >90% coverage of the genome (**Figure S2**). This

155 sequence did, however, share common ancestry with similarly B.1 sequences, supporting  
156 proper lineage assignment (**Figure S3**). The two individuals harboring the B.1.429 California  
157 VOC belonged to a clade of 20 individuals comprised of additional B.1.429/B.1.427 variants,  
158 confirming lineage classification using Pangolin (**Figure 1C**). The remaining 18 sequences  
159 within this clade consisted primarily of Floridian sequences (nine from Alachua County), with the  
160 exception of one individual from Minnesota, suggesting largely local transmission of this variant,  
161 though directionality of transmission cannot be inferred. The two vaccine-breakthrough cases  
162 with the B.1.429 VOC in this study (STP-413 and STP-412) reported separate exposures; the  
163 two individuals were also not more closely related to each other phylogenetically than the  
164 remainder of the sequences (with significant support), so we can neither confirm nor exclude the  
165 possibility of a relationship via direct transmission between these two individuals specifically.

166  
167 Circulation of the other VOC in the US, B.1.1.7, has been defined as the result of at least two  
168 separate introductions (3). One introduction was estimated to occur early November, 2020, into  
169 California, and was characterized by a virus resembling more closely the traditional UK variant.  
170 The second introduction, estimated to occur in late November, carried a silent mutation from  
171 cytosine to thymine within the ORF1ab gene encoding the RNA-dependent RNA polymerase  
172 (position 15720 relative to genome start). The expanding virus populations originating from  
173 these two events were referred to as “Clade 1” and “Clade 2.” Approximately 13% of B.1.1.7  
174 individuals within the total Florida sample, and 86% of B.1.1.7 in Alachua County, harbored the  
175 “Clade 2” C15720T mutation, including the vaccine-breakthrough case. This individual (STP-11)  
176 belonged to a well-supported clade in this study comprised of five total individuals (**Figure 1D**),  
177 all sharing the B.1.1.7 lineage designation (again confirming pangolin classification) and “Clade  
178 2” mutation. Despite the prevalence of the “Clade 2” mutation among B.1.1.7 individuals in  
179 Alachua County, only one other sample within the vaccine-breakthrough clade originated from

180 the county. The remaining four samples were collected in Pennsylvania, New York, and New  
181 Jersey, consistent with the earlier evidence of a more widespread presence of this B.1.1.7  
182 variant within the US (3). The individual was reportedly exposed to a recent COVID-19 case  
183 outside of the household. Contact tracing of this individuals' exposed contacts did not identify  
184 any secondary cases associated with this vaccine failure, and so the question of ongoing  
185 transmission following infection in this individual remains unanswered.

186  
187 The final clade containing the low-frequency B.1.377 vaccinated individual (STP-410) shared  
188 significant common ancestry with a single Floridian B.1.377 sequence, confirming lineage  
189 classification and suggesting transmission within Florida, but not confined to the county (**Figure**  
190 **1E**).

191  
192 Even though infection in fully vaccinated individuals does not appear to be related to the viral  
193 variant, mutational analysis was necessary to determine if 1) recently acquired mutations (i.e.,  
194 not conserved among the corresponding lineage) could potentially be responsible for limited  
195 protection of the vaccine against infection or 2) evidence exists for the emergence of vaccine-  
196 resistant variants. The viral protein commonly referred to as the Spike protein is structurally  
197 important for coronaviruses, rendering it susceptible to recognition by the host immune  
198 response, specifically the receptor-binding domain (RBD). For this reason, vaccination efforts  
199 have largely focused on this region of the genome (9, 20, 21), though there is evidence that the  
200 host immune system can also target the N-terminal domain (NTD, (22, 23)). The natural  
201 accumulation of mutations in these regions owing to the error-prone viral replication machinery  
202 can lead to the ability of the virus to evade the host immune response, including that of  
203 vaccinated individuals, and may be responsible for enhanced transmissibility of the variant (24).  
204 The B.1.429 and B.1.377 variants found within three of the breakthrough-vaccinated individuals  
205 did not appear to have acquired any additional Spike mutations outside of those associated with



206 the parental lineage, suggesting newly acquired mutations were not responsible for  
207 breakthrough infections and that this individual did not harbor a vaccine-resistant variant.  
208 However, two mutations relative to the parental B.1.1.7 lineage (1) were observed within the  
209 Spike protein for the B.1.1.7 vaccinated individual – L18F and K1191N within the NTD and C-  
210 terminal domain (CTD) of the Spike protein, respectively (**Figure 2A**, corresponding to positions  
211 within the reference sequence MN908947). The HR2 K1191N mutation was present in ~75% of  
212 samples for Alachua County, ~75% of the remainder of Florida samples, and ~75% of US  
213 reference sequences, suggesting a less recent acquisition of this mutation in the population and  
214 no relation to vaccine-mediated adaptation or an enhanced ability to infect vaccinated  
215 individuals. Alternatively, the NTD L18F mutation was far less prevalent, only observed in 16  
216 individuals from Florida (dating back to January 15, 2021), but not from the Alachua County  
217 area (**Figure 2B**). It was known that the B.1.1.7 vaccination-breakthrough individual (STP-11)  
218 was exposed to an infected individual from Orange County, Florida, which suggests a regional  
219 Florida outbreak with this particular mutation that spilled over into Alachua County. No evidence  
220 of secondary cases associated with this individual again cannot confirm ongoing transmission of  
221 this variant among vaccinated individuals, though this mutation may warrant further investigation  
222 for its antigenic properties and relationship to vaccination efficacy.

223  
224 Several molecular vaccine and/or antigenic studies in the context of the B.1.1.7 variant have  
225 focused on the RBD, demonstrating no significant effect on neutralization of the virus (25) and  
226 no loss of affinity for host antibodies (Abs) to the RBD when compared to the original strain.  
227 Meanwhile, mutations in the NTD (other than L18F) have been proposed to alter Ab affinity,  
228 potentially paving the way for infection in vaccinated individuals (20). The structural  
229 consequence of the recently acquired NTD L18F mutation indicates that this Floridian B.1.1.7  
230 variant may be a variant of concern. In addition to B.1.1.7 deletions that eliminate antigenic  
231 epitopes for neutralizing antibodies (26) and T cells ( $\Delta 69-70$ ,  $\Delta 144$ ), this variant exhibits an

232 amino acid change with the potential to stabilize the NTD of the Spike protein. Amino acid  
233 position 18 is located within the N1 loop (residues 14 to 26), wherein the original L (Leucine) is  
234 oriented towards F (Phenylalanine) at position 79 of the N2 loop (residues 67 to 79, **Figure 3A**).  
235 The change from L to F in the Florida B.1.1.7 variant is predicted to form stabilizing contacts  
236 between F18 in the N1 loop and S252 in the N5 loop (residues 246 to 260) (**Figure 3B**). These  
237 data suggest that the Floridian B.1.1.7 variant found in the B.1.1.7 vaccinated individual may  
238 exhibit a fitness advantage that results from increased stability and functionality of the NTD.

239

240 In order to verify viability of this new mutation, infectivity of the virus isolated from individual  
241 STP-11 was measured *in vitro* (**online Methods**). Positive infection, and thus viability, was  
242 defined by the presence of virus-specific cytopathic effects (CPE) on Vero E6 cells (African  
243 green monkey kidney cells). CPE were first noted 12 days post-inoculation (dpi), primarily  
244 consisting of rounding of cells, some in the process of detaching from the growing surface  
245 (**Figure 4**). Quantification of virus at 12 dpi for the STP-11 sample-infected cells and control (no  
246 viral inoculation) confirmed viral replication ( $C_q$  8.14 and  $C_q > 39$ , respectively).

247

## 248 **Discussion**

249 A recent study in Israel reported that vaccinated individuals were disproportionally infected with  
250 VOCs relative to the unvaccinated population (27). Whereas we cannot exclude the impact of  
251 prevalence of VOCs within the Florida population on their rate of breakthrough, the findings of  
252 our study, collectively with (27), indicate limited protection of the BNT162b2 mRNA vaccine (and  
253 potentially others) against emerging variants of SARS-CoV-2. It is important to note that none of  
254 the breakthrough individuals in this study was hospitalized, corroborating the vaccine's 100%  
255 efficacy against severe disease (9). While these individuals presented with only mild symptoms  
256 (or no symptoms at all), the number of vaccine breakthrough cases might be expected to be  
257 under-reported. Hence, if we assume at least a minority of test-positive vaccinated individuals

258 harbor infectious virus, the potential for hidden reservoirs within the global populations is  
259 increased. Hidden reservoirs in asymptomatic or mild symptomatic individuals, as has been  
260 proposed (15), pose a particular threat to early recognition of mutations of potential concern,  
261 such as the L18F mutation described herein, particularly once vaccination is more widespread.  
262 Moreover, given the effectiveness of the vaccine in limiting symptom presentation, vaccinated  
263 individuals may engage more frequently in social activities, increasing the risk of exposure.  
264 Continued testing and case management, assessing contacts and exposure, for vaccinated  
265 individuals is thus encouraged and will be forthcoming in determining whether the vaccine is  
266 protective against ongoing evolution and spread of SARS-CoV-2. This strategy is particularly  
267 important in the face of relaxed guidelines regarding masked protection and social distancing for  
268 vaccinated individuals, declared by the CDC as of May, 2021.

269

## 270 **Acknowledgments**

271 This work was supported by the Stephany W. Holloway University of Florida Chair and by funds  
272 of the University of Florida Office of Research and Health Science Center with resources from  
273 the Interdisciplinary Center for Biotechnology Research Gene Expression Core  
274 (RRID:SCR\_019145), NextGen Sequencing Core (RRID:SCR\_019152) and Bioinformatics Core  
275 (RRID:SCR\_019120). Funding for this work was also provided by National Science Foundation  
276 (NSF) – Division Of Environmental Biology (DEB) award no. 2028221.

277

278

279 **Table 1. Reported cases of vaccination breakthroughs in Alachua County, Florida.**

| <b>Characteristic</b> |             |
|-----------------------|-------------|
| <b>Age (years)</b>    | 34.0 (15.0) |
| <b>Sex</b>            |             |
| Female                | 9 (90.0%)   |
| <b>Race</b>           |             |
| White                 | 8 (80.0%)   |
| <b>Ethnicity</b>      |             |

|                                                                                             |             |
|---------------------------------------------------------------------------------------------|-------------|
| <b>Hispanic</b>                                                                             | 2 (20.0%)   |
| <b>Symptoms (Y)</b>                                                                         | 8 (80.0%)   |
| Cough                                                                                       | 1 (12.5%)   |
| Anosmia                                                                                     | 1 (12.5%)   |
| Sore throat                                                                                 | 3 (37.5%)   |
| Headache                                                                                    | 4 (50.0%)   |
| Runny nose                                                                                  | 5 (62.5%)   |
| Fatigue                                                                                     | 2 (25.0%)   |
| <b>Comorbidities</b>                                                                        |             |
| Asthma                                                                                      | 1 (10.0%)   |
| <b>BMI</b>                                                                                  | 24.6 (5.0)  |
| <b>Known exposure (Y)</b>                                                                   | 7 (70.0%)   |
| Household                                                                                   | 4 (57.1%)   |
| Community                                                                                   | 3 (42.9%)   |
| <b>Occupation</b>                                                                           |             |
| Healthcare worker                                                                           | 7 (70.0%)   |
| Student engaged in patient care                                                             | 2 (20%)     |
| Unemployed                                                                                  | 1 (10%)     |
| <b>Time between second vaccination dose and disease onset (days)</b>                        | 37.6 (21.3) |
| <b>Time between disease onset (for symptomatic cases) and sample collection date (days)</b> | 5.0 (2.0)   |

280 \*Results are presented as frequency (%) for categorical variables and mean (standard deviation) for  
 281 continuous variables.  
 282  
 283

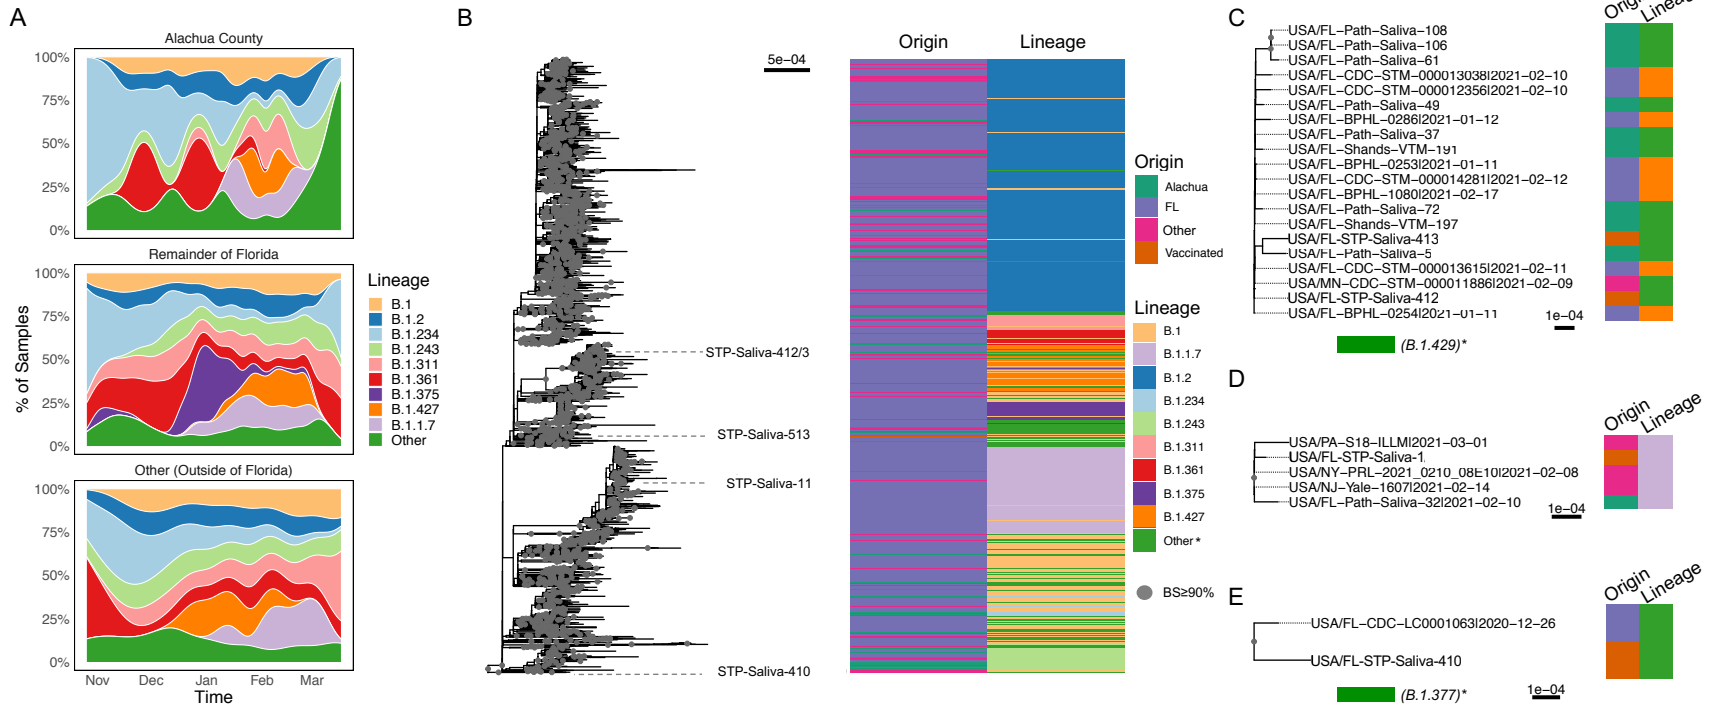

284

285 **Figure 1. Distribution of identified lineages and geographical origin of sampling over time (A) and within the phylogenetic tree (B-D) of**  
 286 **SARS-CoV-2 data collected from Florida and relevant non-Florida locations.** (A) Lineage (as identified using Pangolin (2) distribution over time  
 287 for Alachua County, the surrounding Florida areas, and locations outside of Florida linked to Florida sequences via genetic similarity. (B) Distribution  
 288 of both assigned lineages and geographic origin (as in (A)) across the maximum likelihood phylogenetic tree. Branches are scaled in genetic  
 289 substitutions/site, and nodes with ≥90% support using bootstrap sampling are indicated by grey dots. Vaccinated individuals within well-supported  
 290 clades have been emphasized, and corresponding clades are represented as insets in panels C-D. \*Other lineages, defined as present within <1%  
 291 of the total sample population.

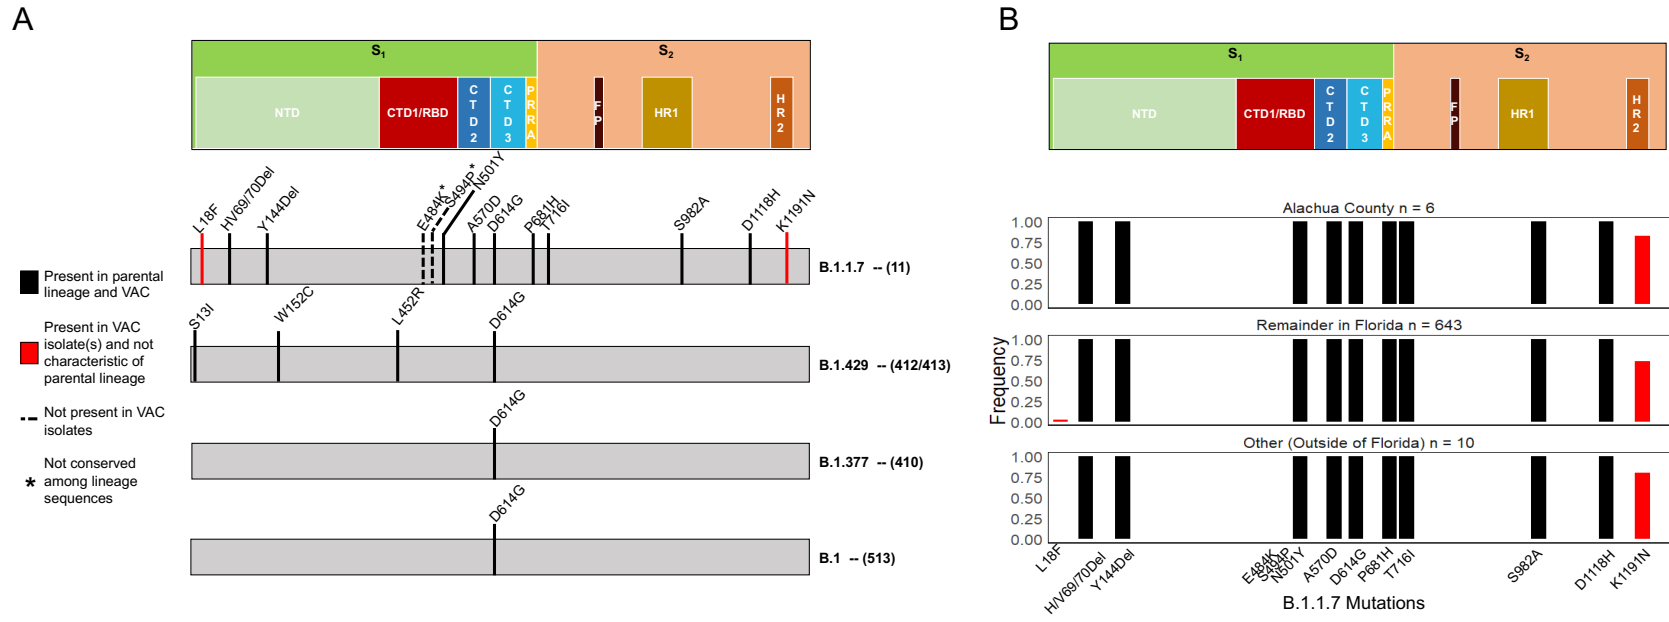

293 **Figure 2. Mutational profiles for vaccine-breakthrough individuals (A) and comparison of B.1.1.7 individuals with remaining sequence**  
 294 **data (B).** Mutations in red are present in vaccinated individual (VAC), but not fixed in the parental lineage. Spike protein architecture is displayed at  
 295 the top of both panels, wherein S = spike subunit (1-2); NTD = N-terminal domain; CTD (1-3) = C-terminal domain; RBD = receptor binding domain;  
 296 PRRA = SARS-CoV-2 characteristic PRRA insertion at the S<sub>1</sub>/S<sub>2</sub> cleavage site; FP = fusion peptide; HR (1-2) heptad repeat. Positions numbers are  
 297 relative to the Spike protein in the MN908947 reference sequence.  
 298  
 299

301

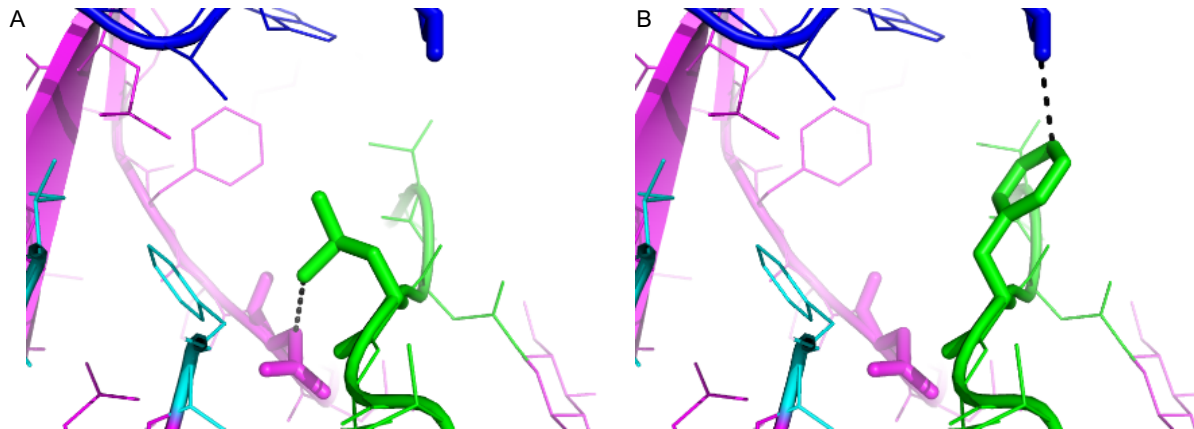

302

303 **Figure 3. Potential stabilizing effect of Floridian B.1.1.7 variant mutation from Leucine (A) to**  
304 **Phenylalanine (B) at position 18 of the Spike protein N-terminal domain (NTD).** Loops N1, N2, and N5  
305 of the NTD are represented in green, pink, and blue, respectively. Modified interactions as a result of the  
306 mutation are represented as dotted lines, with original L18 oriented toward position F79 (cyan) of the N1  
307 loop (A), and the variant F18 toward S252 of the N5 loop (B), potentially acting to stabilize. Dotted lines  
308 represent distances 3.8 (A) and 3.6 (B) Angstrom. Positions numbers are relative to the Spike protein in  
309 the MN908947 reference sequence.  
310

310

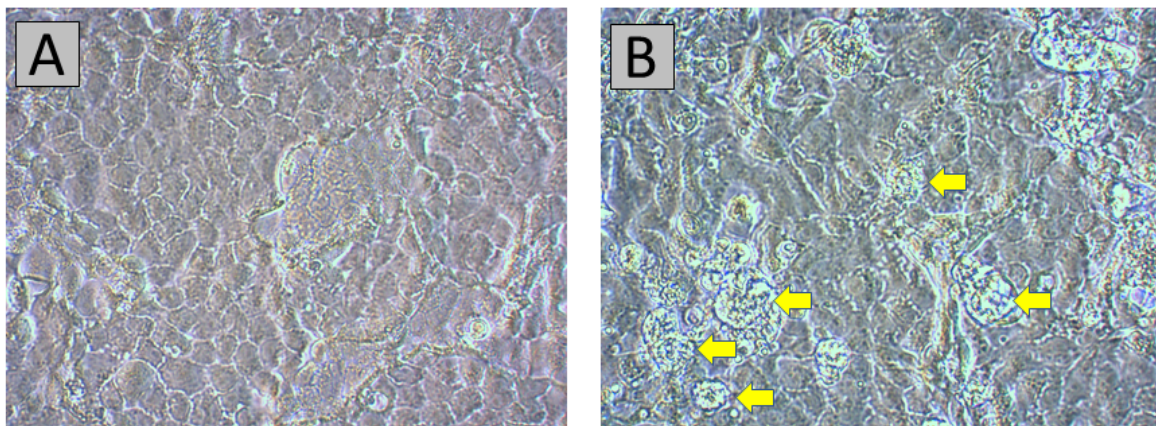

311

312 **Figure 4. Cytopathic effects in Vero E6 cells inoculated with saliva sample FL-STP-Saliva-11.** (A)  
313 Mock-infected Vero E6 cells, 12 dpi. (B) Early SARS-CoV-2-specific CPE, 12 dpi. Rounded cells, some in  
314 the process of detaching from the growth surface, are pointed out by yellow arrows. Original magnification  
315 at 400X.  
316  
317

318

319

320 **Methods**

321

322 **Participant involvement and sample processing.** UF Health Screen, Test & Protect (STP)  
323 assists the Florida Department of Health in Alachua County with COVID-19 case and contact  
324 tracing efforts in its UF students, faculty, staff and other UF-affiliated people including the UF  
325 Health Academic Medical Center (~123,000 total UF Affiliates). Full epidemiological  
326 investigations were conducted on positive cases to collect exposure information, trace contacts,  
327 and provide disease transmission education. Fully vaccinated individuals who became a contact  
328 (defined as  $\geq 15$ min and closer than 6 feet) were called and provided public health education but  
329 not placed into quarantine. For 14 days after their last exposure, they received a daily text or  
330 email to record symptom development. Immediate PCR testing was recommended for anyone  
331 newly reporting symptoms and day 7 PCR testing was recommended for all fully vaccinated but  
332 exposed individuals, regardless of symptom development. Individuals working in health care  
333 settings may have been sampled more frequently due to internal hospital policies.

334 Fully vaccinated UF affiliates deemed PCR-positive for SARS-CoV-2 were eligible for molecular  
335 epidemiology investigation as part of the STP program if they met the following criteria:

336 1) The case must be infectious at the time of saliva sample donation. Infectiousness was  
337 defined  $\leq 10$  days after the onset of symptoms or for an asymptomatic individual  $\leq 10$  days after  
338 the positive lab collection date.

339 2) The case must meet the definition of a vaccine-breakthrough case. Defined as PCR-  
340 positive for SARS-CoV-2 and  $\geq 14$  days after the second dose of Pfizer or Moderna.

341 If both criteria were met and individuals volunteered to provide a sample for the purpose of  
342 public health molecular surveillance, they were scheduled to arrive on-site for sample collection  
343 as soon as possible to increase the probability of detectable virus at the time of collection. Each



344 participant was asked to give a saliva sample of at least 2 mL in total volume and was instructed  
345 not to drink anything for 10 minutes prior to giving the sample. The saliva was collected in a 15  
346 mL conical tube, filling it to the 2 mL marking on the tube, not including froth. Patient samples  
347 were de-identified following Institutional Review Board approval before viral processing. Viral  
348 RNA was extracted from 180 uL of each saliva sample using the QIAamp 96 Viral RNA Kit with  
349 the QIAcube HT (Qiagen, Germantown, MD) using the following settings with a filter plate: the  
350 lysed sample was premixed 8 times before subjecting to vacuum for 5 minutes at 25kP and  
351 vacuum for 3 min at 70kPa. Following 3 washes using the same vacuum conditions above, the  
352 samples were eluted in 100 uL AVE buffer followed by a final vacuum for 6 minutes at 60kPa.  
353 Nine microliters of RNA was used for cDNA synthesis and library preparation using the  
354 COVIDSeq Test kit (Illumina, San Diego, CA) and Mosquito HV Genomics Liquid Handler (SPT  
355 Labtech Inc., Boston MA). The size and purity of the library was determined using the 4200  
356 TapeStation System (Agilent, Santa Clara, CA) and the Qubit dsDNA HS Assay Kit (Life  
357 Technologies, Carlsbad, CA) according to the manufacturer's instructions. Constructed libraries  
358 were pooled and sequenced using the NovaSeq 6000 Sequencing System SP Reagent Kit and  
359 the NovaSeq Xp 2-Lane Kit. Illumina's DRAGEN pipeline was used to derive sample  
360 consensus sequences, which were filtered based on a minimum of 70% coverage of the  
361 genome.

362

363 **Database sequence retrieval.** Each Floridian sequence was used in a local alignment (BLAST)  
364 (28) search for the most (genetically) similar non-Floridian sequence in the GISAID database as  
365 of March 23, 2021, and linked to two reference sequences including the best match (highest E-  
366 value) with a date occurring within one month following, as well as one month prior to the  
367 sampling date of the Floridian sequence (15). After removing duplicate sequences (sequences  
368 with same GISAID ID), sequences were aligned in viralMSA (29) using the MN908947 reference

369 sequence, and mutations potentially associated with contamination, recurrent sequencing  
370 errors, or hypermutability were masked using a vcf filter ([https://virological.org/t/masking-  
371 strategies-for-sars-cov-2-alignments/480](https://virological.org/t/masking-strategies-for-sars-cov-2-alignments/480)).

372

373 **Cell culture for viral infectivity.** Vero E6 cells were used for SARS-CoV-2 isolation attempts.  
374 The cells had been obtained from the American Type Culture Collection (catalog no. ATCC  
375 CRL-1586) and have been used for our SARS-CoV-2 projects (30-33), including the isolation  
376 of > 30 SARS-CoV-2 isolates from human and environmental samples. The cells were  
377 propagated in cell culture medium comprised of aDMEM (advanced Dulbecco's modified  
378 essential medium, Invitrogen, Carlsbad, CA) supplemented with 10% low antibody, heat-  
379 inactivated, gamma-irradiated fetal bovine serum (FBS, Hyclone, GE Healthcare Life Sciences,  
380 Pittsburgh, PA), L-alanine, L-glutamine dipeptide supplement (GlutaMAX.), and 50 µg/mL  
381 penicillin, 50 µg/mL streptomycin, 100 µg/mL neomycin (PSN antibiotics, Invitrogen) with  
382 incubation at 37°C in 5% CO<sub>2</sub>.

383

384 **Isolation of virus in cultured cells.** Virus isolation attempts were performed in a BSL3  
385 laboratory at the University of Florida Emerging Pathogens Institute (EPI) by analysts who wore  
386 powered air-purifying respirators and engaged in BSL3 work practices. Vero E6 cells grown as  
387 monolayers in a T-25 flask (growing surface 25 cm<sup>2</sup>) were inoculated when they were at 80% of  
388 confluency as follows: for each flask, the spent cell culture medium was removed and replaced  
389 with 1 mL of supplemented aDMEM medium ("complete medium") with 10% FBS, and the cells  
390 inoculated with 50 µL of unfiltered saliva. Prior to inoculation, samples were frozen (-80°C)  
391 within 15 minutes following collection. Samples were only thawed once to produce an aliquot for  
392 processing. The inoculated cell cultures were incubated at 37°C in 5% CO<sub>2</sub>, and rocked every  
393 15 minutes for 1 hour, after which 4 mL of complete medium with 10% FBS was added. The  
394 following day, the cell culture media was completely removed and replenished with 5 mL of

395 maintenance medium (complete medium with 3% FBS). Mock-infected cell cultures were  
396 maintained in parallel with the other cultures. The cell cultures were refed every 3 days by the  
397 replacement of 2 mL of spent media with maintenance medium. The cells were observed daily  
398 for one month before being judged negative for virus isolation, with a blind passage performed  
399 15 days post-inoculation of the cells. When virus-induced cytopathic effects (CPE) were evident,  
400 the presence of SARS-CoV-2 in the cell culture medium was examined by real-time reverse  
401 transcription PCR (rRT-PCR). In the event that SARS-CoV-2 strains that were not cytolytic or  
402 did not produce CPE had been isolated, the culture media were blindly tested at weekly  
403 intervals.

404

405 **Detection of SARS-CoV-2 genomic RNA (vRNA) in cell culture medium.** vRNA was  
406 extracted from virions in collection media in a Class II biosafety cabinet in a BSL3 laboratory at  
407 the EPI by analysts wearing appropriate personal protective equipment (chemically impervious  
408 Tyvek lab coats and gloves) and using powered-air purifying respirators. The vRNA was  
409 extracted from 140 µL aliquots of the collection media using a QIAamp Viral RNA Mini Kit  
410 (Qiagen, Valencia, CA, USA), and purified RNA eluted from the RNA-binding silicon column in a  
411 volume of 80 µL. Twenty-five µL (final volume) rRT-PCR tests were performed in a BioRad  
412 CFX96 Touch Real-Time PCR Detection System using 5 µL of purified vRNA and the N1 and  
413 N2 primers and their corresponding probes of the CDC 2019-Novel Coronavirus (2019-nCoV)  
414 rtRT-PCR test (34). The primers and probes were purchased from Integrated DNA  
415 Technologies (IDT, Coralville, Iowa, USA). A plasmid that encodes the SARS-CoV-2 N-gene  
416 sequence was purchased from IDT and used in positive control reactions for the CDC N1 and  
417 N2.

418 The rRT-PCR tests were performed using the following parameters: 400 nM final  
419 concentration of forward and reverse primers and 100 nM final concentration of probe using a  
420 SuperScript III One-Step RT-PCR system with Platinum Taq DNA Polymerase (ThermoFisher

421 Scientific). Cycling conditions were 20 minutes at 50°C for reverse transcription, followed by 2  
 422 minutes at 95°C for Taq polymerase activation, then 45 cycles of denaturation for 15 seconds at  
 423 95°C, annealing for 30 seconds at 55°C, and extension at 68°C for 20 seconds.

424

425 **Table S1. Sample and sequencing information for vaccinated (VAC) individuals.**

| VAC-ID         | Time between second vaccination dose and disease onset <sup>a</sup> (days) | Time between onset <sup>b</sup> and sample collection (days) | Symptom status | Exposure  | Lineage      |
|----------------|----------------------------------------------------------------------------|--------------------------------------------------------------|----------------|-----------|--------------|
| STP-Saliva-11  | 31                                                                         | 4                                                            | Symptomatic    | Community | B.1.1.7      |
| STP-Saliva-410 | 36                                                                         | 6                                                            | Symptomatic    | Household | B.1.377      |
| STP-Saliva-409 | 32                                                                         | 4                                                            | Symptomatic    | Household | Undetermined |
| STP-Saliva-412 | 37                                                                         | 6                                                            | Symptomatic    | Community | B.1.429      |
| STP-Saliva-413 | 35                                                                         | 7                                                            | Symptomatic    | Household | B.1.429      |
| STP-Saliva-411 | 47                                                                         | 3                                                            | Asymptomatic   | Household | Undetermined |
| STP-Saliva-512 | 27                                                                         | 5                                                            | Symptomatic    | Unknown   | Undetermined |
| STP-Saliva-511 | 51                                                                         | 1                                                            | Asymptomatic   | Unknown   | Undetermined |
| STP-Saliva-514 | 39                                                                         | 7                                                            | Symptomatic    | Community | Undetermined |
| STP-Saliva-513 | 41                                                                         | 7                                                            | Symptomatic    | Unknown   | B.1          |

426 <sup>a</sup>Onset implies the date of symptom onset for symptomatic individuals or the date of lab collection for the  
 427 result of virus detection among asymptomatic individuals.  
 428

429 **Table S2. Respiratory virus coverage during sequencing of saliva samples from vaccine-  
 430 breakthrough individuals.**

| VAC-ID         | Virus                                        | Total Coverage <sup>a</sup> | Median Coverage <sup>b</sup> |
|----------------|----------------------------------------------|-----------------------------|------------------------------|
| STP-Saliva-11  | Influenza B virus (B/Brisbane/60/2008)       | 17369                       | 0                            |
|                | Influenza A virus (A/Michigan/45/2015(H1N1)) | 2368                        | 0                            |
|                | Influenza B virus (B/Wisconsin/01/2010)      | 1352                        | 0                            |
|                | Influenza A virus (A/Texas/50/2012(H3N2))    | 874                         | 0                            |
|                | Influenza B virus (B/Washington/02/2019)     | 50                          | 0                            |
| STP-Saliva-409 | Influenza B virus (B/Brisbane/60/2008)       | 843                         | 0                            |
|                | Influenza A virus (A/Michigan/45/2015(H1N1)) | 139                         | 0                            |
|                | Influenza A virus (A/Texas/50/2012(H3N2))    | 27                          | 0                            |
|                | Influenza B virus (B/Wisconsin/01/2010)      | 24                          | 0                            |
|                | Influenza B virus (B/Lee/1940)               | 12                          | 0                            |
| STP-Saliva-410 | Influenza B virus (B/Brisbane/60/2008)       | 9748                        | 0                            |
|                | Influenza A virus (A/Michigan/45/2015(H1N1)) | 1310                        | 0                            |
|                | Influenza A virus (A/Texas/50/2012(H3N2))    | 656                         | 0                            |
|                | Influenza B virus (B/Wisconsin/01/2010)      | 480                         | 0                            |
|                | Human coronavirus HKU1                       | 88                          | 0                            |

|                |                                                |       |   |
|----------------|------------------------------------------------|-------|---|
|                | Influenza B virus (B/Washington/02/2019)       | 57    | 0 |
|                | Human coronavirus NL63                         | 35    | 0 |
|                | Human adenovirus B1                            | 27    | 0 |
|                | Human adenovirus E4                            | 14    | 0 |
|                | Influenza A virus (A/Puerto Rico/8/1934(H1N1)) | 12    | 0 |
|                | Influenza B virus (B/Brisbane/60/2008)         | 801   | 0 |
|                | Influenza A virus (A/Michigan/45/2015(H1N1))   | 109   | 0 |
| STP-Saliva-411 | Influenza A virus (A/Texas/50/2012(H3N2))      | 79    | 0 |
|                | Influenza B virus (B/Wisconsin/01/2010)        | 26    | 0 |
|                | Human adenovirus B1                            | 23    | 0 |
|                | Influenza A virus (A/Puerto Rico/8/1934(H1N1)) | 12    | 0 |
|                | Influenza B virus (B/Brisbane/60/2008)         | 14738 | 0 |
|                | Influenza A virus (A/Michigan/45/2015(H1N1))   | 2055  | 0 |
| STP-Saliva-412 | Influenza A virus (A/Texas/50/2012(H3N2))      | 1447  | 0 |
|                | Influenza B virus (B/Wisconsin/01/2010)        | 1065  | 0 |
|                | Influenza B virus (B/Washington/02/2019)       | 54    | 0 |
|                | Human adenovirus C2                            | 35    | 0 |
|                | Influenza B virus (B/Lee/1940)                 | 13    | 0 |
|                | Influenza A virus (A/Michigan/45/2015(H1N1))   | 6848  | 0 |
|                | Influenza B virus (B/Brisbane/60/2008)         | 5036  | 0 |
|                | Influenza A virus (A/Texas/50/2012(H3N2))      | 306   | 0 |
|                | Influenza B virus (B/Wisconsin/01/2010)        | 241   | 0 |
| STP-Saliva-413 | Human adenovirus C2                            | 36    | 0 |
|                | Human coronavirus NL63                         | 25    | 0 |
|                | Human metapneumovirus (CAN97-83)               | 24    | 0 |
|                | Human adenovirus E4                            | 22    | 0 |
|                | Human parainfluenza virus 3                    | 13    | 0 |
|                | Influenza A virus (A/Puerto Rico/8/1934(H1N1)) | 12    | 0 |
|                | Influenza B virus (B/Brisbane/60/2008)         | 1269  | 0 |
| STP-Saliva-511 | Influenza A virus (A/Michigan/45/2015(H1N1))   | 168   | 0 |
|                | Influenza A virus (A/Texas/50/2012(H3N2))      | 62    | 0 |
|                | Influenza B virus (B/Brisbane/60/2008)         | 133   | 0 |
|                | Influenza B virus (B/Wisconsin/01/2010)        | 87    | 0 |
| STP-Saliva-512 | Influenza A virus (A/Michigan/45/2015(H1N1))   | 51    | 0 |
|                | Human adenovirus C2                            | 12    | 0 |
|                | Human adenovirus B1                            | 12    | 0 |
|                | Human bocavirus 4 NI strain HBoV4-NI-385       | 12    | 0 |

|                |                                                |      |   |
|----------------|------------------------------------------------|------|---|
| STP-Saliva-513 | Influenza B virus (B/Brisbane/60/2008)         | 5498 | 0 |
|                | Influenza A virus (A/Michigan/45/2015(H1N1))   | 1550 | 0 |
|                | Influenza A virus (A/Texas/50/2012(H3N2))      | 551  | 0 |
|                | Influenza B virus (B/Wisconsin/01/2010)        | 330  | 0 |
|                | Influenza B virus (B/Washington/02/2019)       | 39   | 0 |
|                | Influenza A virus (A/Puerto Rico/8/1934(H1N1)) | 12   | 0 |
|                | Human adenovirus B1                            | 12   | 0 |
| STP-Saliva-514 | Human adenovirus C2                            | 111  | 0 |
|                | Respiratory syncytial virus (type A)           | 24   | 0 |
|                | Influenza B virus (B/Lee/1940)                 | 13   | 0 |
|                | KI polyomavirus Stockholm 60                   | 13   | 0 |
|                | Influenza B virus (B/Wisconsin/01/2010)        | 13   | 0 |

431 <sup>a</sup>Total number of bases observed for viral (partial) target using COVIDSeq Test kit (Illumina, San Diego, CA)

432 <sup>b</sup>Coverage per base within viral (partial) target using COVIDSeq Test kit (Illumina, San Diego, CA)

433

434

435

436

**Table S3. Quantification results from initial detection of SARS-CoV-2 (at time of diagnosis) in vaccinated individuals**

| VAC-ID                      | Cq <sup>ab</sup> (Time of diagnosis   Time of secondary saliva sample collection) |
|-----------------------------|-----------------------------------------------------------------------------------|
| STP-Saliva-11 <sup>b</sup>  | Not available                                                                     |
| STP-Saliva-410 <sup>b</sup> | Not available                                                                     |
| STP-Saliva-409 <sup>b</sup> | Not available                                                                     |
| STP-Saliva-412 <sup>b</sup> | Not available                                                                     |
| STP-Saliva-413 <sup>b</sup> | Not available                                                                     |
| STP-Saliva-513 <sup>b</sup> | Not available                                                                     |
| STP-Saliva-411              | Not available                                                                     |
| STP-Saliva-512              | Not available                                                                     |
| STP-Saliva-511              | 36.48   30.74                                                                     |
| STP-Saliva-514              | 28.85   35.59                                                                     |

437 <sup>a</sup>PCR quantification cycle

438 <sup>c</sup>Vaccinated individuals with 70% genome coverage at 50x sequencing coverage/site.

439 \*

440 **Table S2. GISAID author acknowledgment table.**

We gratefully acknowledge the following Authors from the Originating laboratories responsible for obtaining the specimens, as well as the Submitting laboratories where the genome data were generated and shared via GISAID, on which this research is based.

All Submitters of data may be contacted directly via [www.gisaid.org](http://www.gisaid.org)

Authors are sorted alphabetically.

| Accession ID                                                                                                                                                   | Originating Laboratory                                                                                                                                                                                                                                                                                                                                                                                                                                                                        | Submitting Laboratory                                                                                                                                                                                                                                                                                                                                                    | Authors                                                                                                                                                                                                                                                                                                                                                                                                                                                                                                                                                                                                                                                                                                                                                                                                                                                                                                                                                                                              |
|----------------------------------------------------------------------------------------------------------------------------------------------------------------|-----------------------------------------------------------------------------------------------------------------------------------------------------------------------------------------------------------------------------------------------------------------------------------------------------------------------------------------------------------------------------------------------------------------------------------------------------------------------------------------------|--------------------------------------------------------------------------------------------------------------------------------------------------------------------------------------------------------------------------------------------------------------------------------------------------------------------------------------------------------------------------|------------------------------------------------------------------------------------------------------------------------------------------------------------------------------------------------------------------------------------------------------------------------------------------------------------------------------------------------------------------------------------------------------------------------------------------------------------------------------------------------------------------------------------------------------------------------------------------------------------------------------------------------------------------------------------------------------------------------------------------------------------------------------------------------------------------------------------------------------------------------------------------------------------------------------------------------------------------------------------------------------|
| EPI_ISL_1225879, EPI_ISL_1226183, EPI_ISL_1226188                                                                                                              | "AK State Public Health Lab, State Health Department"                                                                                                                                                                                                                                                                                                                                                                                                                                         | Genomics and Discovery, Respiratory Viruses Branch, Division of Viral Diseases, Centers for Disease Control and Prevention                                                                                                                                                                                                                                               | Anna Montmayeur; Anna Uehara; Ben L. Rambo-Martin; Clinton R. Paden; Dhvani Batra; Haibin Wang; Jasmine Padilla; Jing Zhang; Justin Lee; Katie Dillon; Krista Queen; Kristen Knipe; Kristine Lacey; Lori Rowe; Mark Burroughs; Matthew Schmeier; Mili Sheth; Peter W. Cook; Rachel Marine; Sam Shepard; Sarah Nobles; Shoshona Le; Suxiang Tong; Yan Li; Ying Tao                                                                                                                                                                                                                                                                                                                                                                                                                                                                                                                                                                                                                                    |
| EPI_ISL_1226332, EPI_ISL_1226338                                                                                                                               | "OK Public Health Laboratory, Oklahoma State DOH"                                                                                                                                                                                                                                                                                                                                                                                                                                             | Genomics and Discovery, Respiratory Viruses Branch, Division of Viral Diseases, Centers for Disease Control and Prevention                                                                                                                                                                                                                                               | Anna Montmayeur; Anna Uehara; Ben L. Rambo-Martin; Clinton R. Paden; Dhvani Batra; Haibin Wang; Jasmine Padilla; Jing Zhang; Justin Lee; Katie Dillon; Krista Queen; Kristen Knipe; Kristine Lacey; Lori Rowe; Mark Burroughs; Matthew Schmeier; Mili Sheth; Peter W. Cook; Rachel Marine; Sam Shepard; Sarah Nobles; Shoshona Le; Suxiang Tong; Yan Li; Ying Tao                                                                                                                                                                                                                                                                                                                                                                                                                                                                                                                                                                                                                                    |
| EPI_ISL_699655                                                                                                                                                 | 1-Laboratory of Microbiology, National Reference Lab, Charles Nicolle Hospital; 2-University of Tunis ElManar, Faculty of Medicine of Tunis, LR99ES09, Tunis, Tunisia                                                                                                                                                                                                                                                                                                                         | 1-Clinical and Experimental Pharmacology Lab, LR16SP02, National Center of Pharmacovigilance, University of Tunis El Manar, Tunis, Tunisia. 2-Neurodegenerative diseases and psychiatric troubles, LR18SP03, Razi Hospital, University of Tunis El Manar, Tunis, Tunisia. 3- Ministry of Health, National Observatory of New and Emerging Diseases, 1006, Tunis, Tunisia | Alia Ben Kahla; Asma Ferjani; Gaiés Emma; Guedj Barrabeh; Hanen ELelbari; Ithem Boutiba-Ben Bouabakar; Jalila Ben Khelil; Maher Kharrat; Mouna Ben Sassi; Mouna Safer; Nissaf Ben Alaya; Riadh Daghtous; Riadh Gouider.; Salma Abid; Salwa Mrabet; Sameh Trabelsi; Sana Ferjani                                                                                                                                                                                                                                                                                                                                                                                                                                                                                                                                                                                                                                                                                                                      |
| EPI_ISL_1013566                                                                                                                                                | 1.AO Universitaria 'S. Giovanni di Dio e Ruggi D'Aragona, Scuola Medica Salernitana' Hospital / 2.UOC di Virologia e Microbiologia, Università della Campania 'L. Vanvitelli' / 3.AO Universitaria 'Federico II' Napoli Hospital / 4.AOHN 'San Giuseppe Moscati' Avelino Hospital / 5.AO 'San Pio' - presidio G. Rummo' Benevento Hospital / 6.AO 'Sant'Anna e San Sebastiano' Caserta Hospital / 7.PO 'Maria Santissima Addolorata' Eboli Hospital / 8.Biogen Istituto di Ricerche Genetiche | 1. Genome Research Center for Health (CRGS) / 2. Laboratory of Molecular Medicine and Genomics(LMMGE) / 3. Center for Research in Pure and Applied Mathematics (CRMPA)                                                                                                                                                                                                   | Alessandro Weisz; Alessia Cossu; Andreina Bai; Aniello Gentile; Annamaria Salvati; Antonello Saccomanno; Arnolfo Petruzzello; Assunta Sellitto; Carlo Ferravante; Domenico Memoli; Domenico Palumbo; Edmondo Adorisio; Elena Alexandrova; Emilia Vaccaro; Fausto Sessa.; Francesca Marciano; Francesca Rizzo; Francesco Curcio; Gianluigi Franci; Giorgio Dirani; Giorgio Giurato; Giovanni Nassa; Giovanni Pecoraro; Giuseppe Fenza; Giuseppe Portella; Gregorio Goffredi; Ilaria Terenzi; Jessica Lamberti; Maddalena Schioppa; Maria Grazia Foti; Maria Landi; Mariana Scrima; Mariarosaria Ingino; Massimiliano Galdiero; Maurizio Fumi; Michela Iacobellis; Michele Caraglia; Michele Cenrarno; Morena D'Avernia; Oriana Strianese; Pasquale Pagliano; Rita Greco; Roberta Tarallo; Rosanna Plulisco; Silvia Zanoli; Simona Sempolini; Sonia Amabile; Stefania Marzotto; Teresa Rocco; Valeria Mirici Cappa; Vincenzo Rocco; Viola Melone; Vittoria Letizia; Vittorio Sambri; Ylenia D'Agostino |
| EPI_ISL_982502                                                                                                                                                 | ADIRONDACK MEDICAL CENTER                                                                                                                                                                                                                                                                                                                                                                                                                                                                     | Wadsworth Center, New York State Department of Health                                                                                                                                                                                                                                                                                                                    | Alexis Russel; Daryl M. Lamson; Erasmus Schneider; Erica Lasek-Nesselquist; John Kelly; Jonathan Pitnick; Kirsten St. George; Matthew Shudt; Melissa A Leisner; Navjot Singh                                                                                                                                                                                                                                                                                                                                                                                                                                                                                                                                                                                                                                                                                                                                                                                                                         |
| EPI_ISL_1095229                                                                                                                                                | AK State Public Health Lab, State Health Department                                                                                                                                                                                                                                                                                                                                                                                                                                           | Respiratory Viruses Branch, Division of Viral Diseases, Centers for Disease Control and Prevention                                                                                                                                                                                                                                                                       | Anna Montmayeur; Anna Uehara; Ben L. Rambo-Martin; Clinton R. Paden; Dhvani Batra; Haibin Wang; Jasmine Padilla; Jing Zhang; Justin Lee; Krista Queen; Lori Rowe; Mark Burroughs; Mili Sheth; Peter W. Cook; Rachel Marine; Suxiang Tong; Yan Li; Ying Tao                                                                                                                                                                                                                                                                                                                                                                                                                                                                                                                                                                                                                                                                                                                                           |
| EPI_ISL_1094818                                                                                                                                                | AR Dept. of Health-Public Health Lab                                                                                                                                                                                                                                                                                                                                                                                                                                                          | Respiratory Viruses Branch, Division of Viral Diseases, Centers for Disease Control and Prevention                                                                                                                                                                                                                                                                       | Anna Montmayeur; Anna Uehara; Ben L. Rambo-Martin; Clinton R. Paden; Dhvani Batra; Haibin Wang; Jasmine Padilla; Jing Zhang; Justin Lee; Krista Queen; Lori Rowe; Mark Burroughs; Mili Sheth; Peter W. Cook; Rachel Marine; Sarah Nobles; Suxiang Tong; Yan Li; Ying Tao                                                                                                                                                                                                                                                                                                                                                                                                                                                                                                                                                                                                                                                                                                                             |
| EPI_ISL_1166231, EPI_ISL_1166252                                                                                                                               | ASL Napoli 1 Centro                                                                                                                                                                                                                                                                                                                                                                                                                                                                           | AMES Centro Poldiagnostico Strumentale S.r.l.                                                                                                                                                                                                                                                                                                                            | *Giovanni Savarese; Antonella Di Carlo; Antonio Fico*; Eloisa Evangelista; Luigi D'Amore; Luisa Circelli; Maurizio D'Amora; Monica Ianniello; Nadia Petrillo; Raffaella Ruggiero; Roberto Sirica                                                                                                                                                                                                                                                                                                                                                                                                                                                                                                                                                                                                                                                                                                                                                                                                     |
| EPI_ISL_1027445, EPI_ISL_1027467, EPI_ISL_1235463, EPI_ISL_1235476                                                                                             | Alameda County Public Health Lab                                                                                                                                                                                                                                                                                                                                                                                                                                                              | Chan-Zuckerberg Biohub                                                                                                                                                                                                                                                                                                                                                   | CZB Clahub Consortium                                                                                                                                                                                                                                                                                                                                                                                                                                                                                                                                                                                                                                                                                                                                                                                                                                                                                                                                                                                |
| EPI_ISL_911688, EPI_ISL_1195922                                                                                                                                | Alaska State Virology Laboratory                                                                                                                                                                                                                                                                                                                                                                                                                                                              | Alaska State Virology Laboratory                                                                                                                                                                                                                                                                                                                                         | Elva House; Jack Chen; Lisa Smith; Ph.D.; Stephanie DeRonde                                                                                                                                                                                                                                                                                                                                                                                                                                                                                                                                                                                                                                                                                                                                                                                                                                                                                                                                          |
| EPI_ISL_933583, EPI_ISL_933589, EPI_ISL_967882, EPI_ISL_978486, EPI_ISL_1016924, EPI_ISL_1064177, EPI_ISL_1184559, EPI_ISL_1239095                             | Arizona State Public Health Laboratory                                                                                                                                                                                                                                                                                                                                                                                                                                                        | Arizona State Public Health Laboratory                                                                                                                                                                                                                                                                                                                                   | Jessica Escobar; Katherine Fullerton; Linda Getsinger; Nobuko Fukushima; Stacy White; Trung Huynh; Victor Waddell                                                                                                                                                                                                                                                                                                                                                                                                                                                                                                                                                                                                                                                                                                                                                                                                                                                                                    |
| see above                                                                                                                                                      | Arizona State Public Health Laboratory                                                                                                                                                                                                                                                                                                                                                                                                                                                        | Bergthaler laboratory, CeMM Research Center for Molecular Medicine of the Austrian Academy of Sciences                                                                                                                                                                                                                                                                   | Andreas Bergthaler; Anna Schedl; Bekir Erguner; Benedikt Agerer; Christoph Bock; Jan Laine; Lukas Endler; Maelle Le Moing; Martin Senekowitsch; Michael Schuster; Thomas Penz                                                                                                                                                                                                                                                                                                                                                                                                                                                                                                                                                                                                                                                                                                                                                                                                                        |
| EPI_ISL_1118038                                                                                                                                                | Austrian Agency for Health and Food Safety (AGES)                                                                                                                                                                                                                                                                                                                                                                                                                                             | Bergthaler laboratory, CeMM Research Center for Molecular Medicine of the Austrian Academy of Sciences                                                                                                                                                                                                                                                                   | Dixey, C.; Edwards, J.; Parrott, T.; Reeves, S.                                                                                                                                                                                                                                                                                                                                                                                                                                                                                                                                                                                                                                                                                                                                                                                                                                                                                                                                                      |
| EPI_ISL_884859                                                                                                                                                 | Bacteriology, Georgia Public Health Laboratory (GPHL)                                                                                                                                                                                                                                                                                                                                                                                                                                         | Bacteriology, Georgia Public Health Laboratory (GPHL)                                                                                                                                                                                                                                                                                                                    | Ari Rao; Kimberly Walker; Linden Morales; Marcus Volz; Shelby Hendrickson                                                                                                                                                                                                                                                                                                                                                                                                                                                                                                                                                                                                                                                                                                                                                                                                                                                                                                                            |
| EPI_ISL_1081181                                                                                                                                                | Baylor Scott & White-Temple                                                                                                                                                                                                                                                                                                                                                                                                                                                                   | Baylor Scott & White-Temple                                                                                                                                                                                                                                                                                                                                              | Anna Uehara; Brian Lynch; Clinton R. Paden; Haibin Wang; Han Jia Ng; Jing Zhang; Krista Queen; Peter Cook; Suxiang Tong; Yan Li; Ying Tao                                                                                                                                                                                                                                                                                                                                                                                                                                                                                                                                                                                                                                                                                                                                                                                                                                                            |
| EPI_ISL_1049207                                                                                                                                                | Blackhawk Genomics                                                                                                                                                                                                                                                                                                                                                                                                                                                                            | Pathogen Discovery, Respiratory Viruses Branch, Division of Viral Diseases, Centers for Disease Control and Prevention                                                                                                                                                                                                                                                   | Adams, G.; B.L.; B.W.; Bauer, M.; Birren; Carter, A.; Chaluvadi, S.; D.J.; DeRuff, K.; Gallagher, G.; Gladden-Young, A.; J.E.; K.J.; Lagerborg, K.; Lemieux; Loreth, C.; MacInnis; Normandin, E.; P.C.; Park; Reilly, S.; Rudy, M.; Siddle; Smole, S.; Tomkins-Tinch, C.; and Sabeti                                                                                                                                                                                                                                                                                                                                                                                                                                                                                                                                                                                                                                                                                                                 |
| EPI_ISL_1121640, EPI_ISL_1253808, EPI_ISL_1253817                                                                                                              | Broad Institute Clinical Research Sequencing Platform                                                                                                                                                                                                                                                                                                                                                                                                                                         | Infectious Disease Program, Broad Institute of Harvard and MIT                                                                                                                                                                                                                                                                                                           | EPI_ISL_906899, EPI_ISL_906900, EPI_ISL_906903, EPI_ISL_906906, EPI_ISL_906908, EPI_ISL_906909, EPI_ISL_906913                                                                                                                                                                                                                                                                                                                                                                                                                                                                                                                                                                                                                                                                                                                                                                                                                                                                                       |
| EPI_ISL_906885, EPI_ISL_906886, EPI_ISL_906887, EPI_ISL_906889, EPI_ISL_906891, EPI_ISL_906892, EPI_ISL_906894, EPI_ISL_906895, EPI_ISL_906897, EPI_ISL_906898 | Bureau of Public Health Laboratories, Florida Department of Health (BPHL, FLDH)                                                                                                                                                                                                                                                                                                                                                                                                               | Bureau of Public Health Laboratories, Florida Department of Health (BPHL, FLDH)                                                                                                                                                                                                                                                                                          | Blanton, J.; Schmedes, S.                                                                                                                                                                                                                                                                                                                                                                                                                                                                                                                                                                                                                                                                                                                                                                                                                                                                                                                                                                            |
| see above                                                                                                                                                      | Bureau of Public Health Laboratories, Florida Department of Health (BPHL, FLDH)                                                                                                                                                                                                                                                                                                                                                                                                               | Bureau of Public Health Laboratories, Florida Department of Health (BPHL, FLDH)                                                                                                                                                                                                                                                                                          |                                                                                                                                                                                                                                                                                                                                                                                                                                                                                                                                                                                                                                                                                                                                                                                                                                                                                                                                                                                                      |
| EPI_ISL_1225957                                                                                                                                                | CA-Los Angeles County Public Health Laboratory                                                                                                                                                                                                                                                                                                                                                                                                                                                | Genomics and Discovery, Respiratory Viruses Branch, Division of Viral Diseases, Centers for Disease Control and Prevention                                                                                                                                                                                                                                               | Anna Montmayeur; Anna Uehara; Ben L. Rambo-Martin; Clinton R. Paden; Dhvani Batra; Haibin Wang; Jasmine Padilla; Jing Zhang; Justin Lee; Katie Dillon; Krista Queen; Kristen Knipe; Kristine Lacey; Lori Rowe; Mark Burroughs; Matthew Schmeier; Mili Sheth; Peter W. Cook; Rachel Marine; Sam Shepard; Sarah Nobles; Shoshona Le; Suxiang Tong; Yan Li; Ying Tao                                                                                                                                                                                                                                                                                                                                                                                                                                                                                                                                                                                                                                    |
| EPI_ISL_1094478                                                                                                                                                | CT-Dr. Katherine A. Kelley State Public Health Lab                                                                                                                                                                                                                                                                                                                                                                                                                                            | Respiratory Viruses Branch, Division of Viral Diseases, Centers for Disease Control and Prevention                                                                                                                                                                                                                                                                       | Anna Montmayeur; Anna Uehara; Ben L. Rambo-Martin; Clinton R. Paden; Dhvani Batra; Haibin Wang; Jasmine Padilla; Jing Zhang; Justin Lee; Krista Queen; Lori Rowe; Mark Burroughs; Mili Sheth; Peter W. Cook; Rachel Marine; Sarah Nobles; Suxiang Tong; Yan Li; Ying Tao                                                                                                                                                                                                                                                                                                                                                                                                                                                                                                                                                                                                                                                                                                                             |
| EPI_ISL_847665                                                                                                                                                 | California Department of Public Health                                                                                                                                                                                                                                                                                                                                                                                                                                                        | Chiu Laboratory, University of California, San Francisco                                                                                                                                                                                                                                                                                                                 | Brian Bushnell; Candace Wang; Charles Chiu; Debra Wadford; Jill Hacker; Scot Federman; Xianding (Wayne) Deng                                                                                                                                                                                                                                                                                                                                                                                                                                                                                                                                                                                                                                                                                                                                                                                                                                                                                         |
| EPI_ISL_824561, EPI_ISL_824679                                                                                                                                 | Cedars-Sinai Medical Center, Department of Pathology & Laboratory Medicine, Molecular Pathology Laboratory                                                                                                                                                                                                                                                                                                                                                                                    | Cedars-Sinai Medical Center, Molecular Pathology Laboratory of Department of Pathology & Laboratory Medicine and Genomic Core                                                                                                                                                                                                                                            | Brian Davis; Eric Vali; Jasmine T Plummer; Jorge Mario Sincuir Martinez; Stephanie Chen; Wenjuan Zhang                                                                                                                                                                                                                                                                                                                                                                                                                                                                                                                                                                                                                                                                                                                                                                                                                                                                                               |
| EPI_ISL_1168655, EPI_ISL_1168671                                                                                                                               | Centers for Disease Control and Prevention, Dengue Branch                                                                                                                                                                                                                                                                                                                                                                                                                                     | Centers for Disease Control and Prevention, Dengue Branch                                                                                                                                                                                                                                                                                                                | Betzabel Flores; Gabriela Paz-Bailey; Gilberto A. Santiago; Glenda Gonzalez; Jorge L. Munoz-Jordan; Keyla Charriez                                                                                                                                                                                                                                                                                                                                                                                                                                                                                                                                                                                                                                                                                                                                                                                                                                                                                   |
| EPI_ISL_961847                                                                                                                                                 | Centrāla laboratorija                                                                                                                                                                                                                                                                                                                                                                                                                                                                         | Latvian Biomedical Research and Study Centre                                                                                                                                                                                                                                                                                                                             | Davidis Fridmanis; Ivars Silamkēlis; Jana Osīte; Janis Pļakovskis; Janis Klovins; Juris Perevoscikovs; Kaspars Megnis; Laila Silamkēle; Lauma Freimane; Laura Ansonē; Līga Birzniece; Marta Priedīte; Monta Ustinova; Nikita Zrelavs; Uga Dumpis; Vita Rovite                                                                                                                                                                                                                                                                                                                                                                                                                                                                                                                                                                                                                                                                                                                                        |
| EPI_ISL_978135, EPI_ISL_978137                                                                                                                                 | Chiu Laboratory, University of California, San Francisco                                                                                                                                                                                                                                                                                                                                                                                                                                      | Chiu Laboratory, University of California, San Francisco                                                                                                                                                                                                                                                                                                                 | Candace Wang; Charles Chiu; Debra Wadford; Jill Hacker; Venice Servellita; Xianding (Wayne) Deng                                                                                                                                                                                                                                                                                                                                                                                                                                                                                                                                                                                                                                                                                                                                                                                                                                                                                                     |
| EPI_ISL_1163754, EPI_ISL_1163791                                                                                                                               | Clinical Molecular Microbiology Laboratory, UNC Hospital                                                                                                                                                                                                                                                                                                                                                                                                                                      | Dirk Dittmer                                                                                                                                                                                                                                                                                                                                                             | Angelica Juarez; Blossom Damania.; Brent A. Eason; Cameron Grant; Carolina Caro-Vegas; Cecilia Thompson; Dirk Dittmer; Evelyn Hoffman; Jason Wong; Justin T. Landis; Linda Pluta; Melissa B. Miller; Patricia Cano; Razia Moorad; Ryan McNamara; Shawn Hawken                                                                                                                                                                                                                                                                                                                                                                                                                                                                                                                                                                                                                                                                                                                                        |
| EPI_ISL_861455, EPI_ISL_911598,                                                                                                                                | Clinical Molecular Microbiology Laboratory, UNC Hospitals                                                                                                                                                                                                                                                                                                                                                                                                                                     | Jeremy Wang                                                                                                                                                                                                                                                                                                                                                              | Alexander Rubinsteyn; Colleen Rice; Corbin Jones; Jason Smedberg; Jeremy Wang; Melissa Miller; Robert Hagan; Shawn Hawken                                                                                                                                                                                                                                                                                                                                                                                                                                                                                                                                                                                                                                                                                                                                                                                                                                                                            |

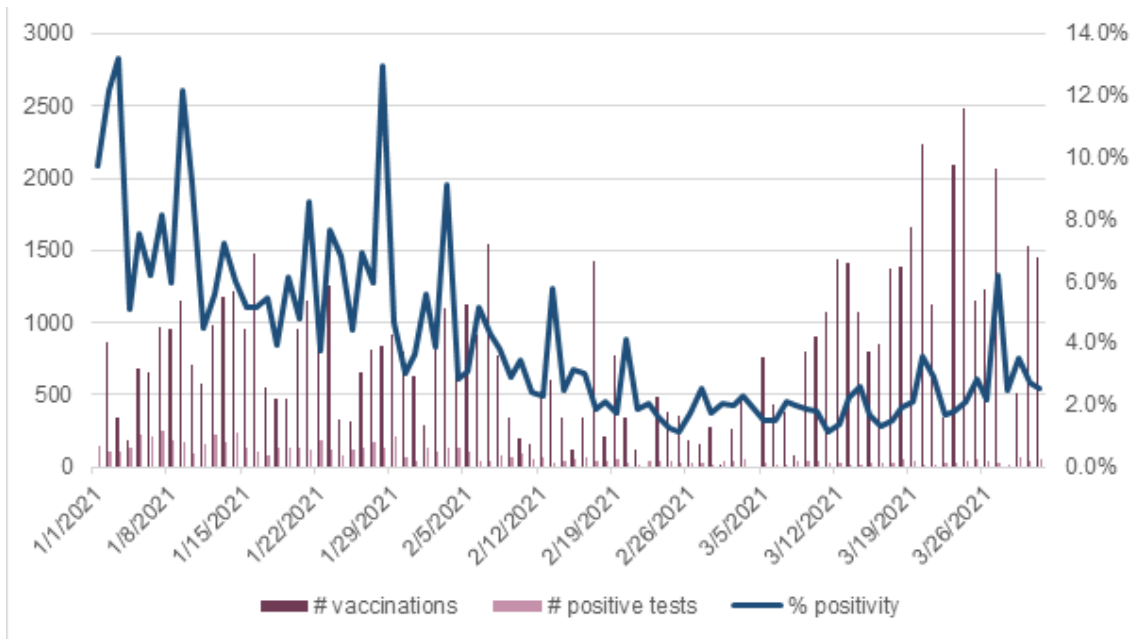

442

443 **Figure S1. COVID-19 vaccinations and test positivity in Alachua County, Florida, from January 1<sup>st</sup> –**  
 444 **March 31<sup>st</sup>, 2021.**

445



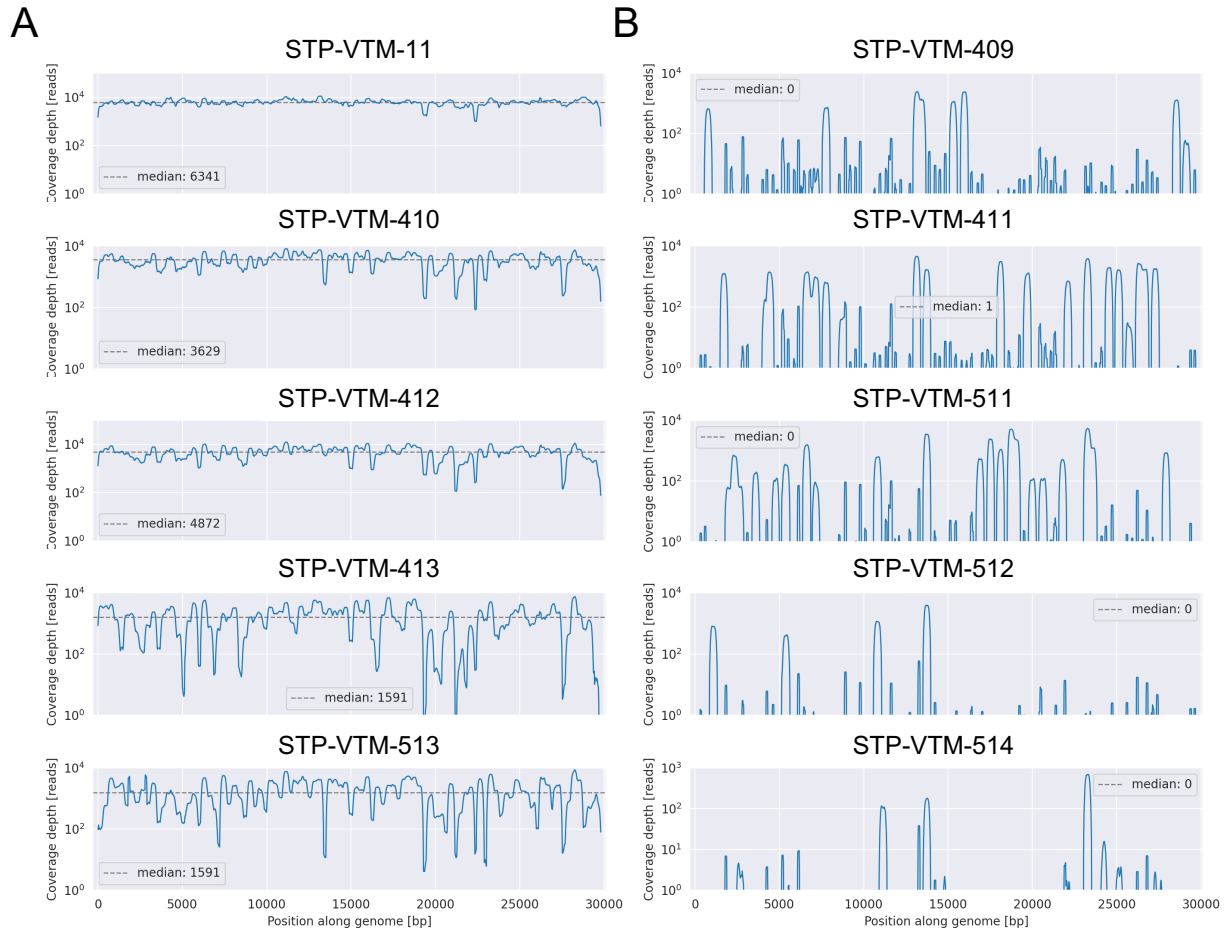

446

447 **Figure S2. SARS-CoV-2 genome coverage for (A) five successfully and (B) five unsuccessfully**  
 448 **sequenced vaccinated individuals.** Coverage in this plot refers to the number of reads representing each  
 449 position within the MN908947 reference SARS-CoV-2 genome and was provided by Illumina.  
 450

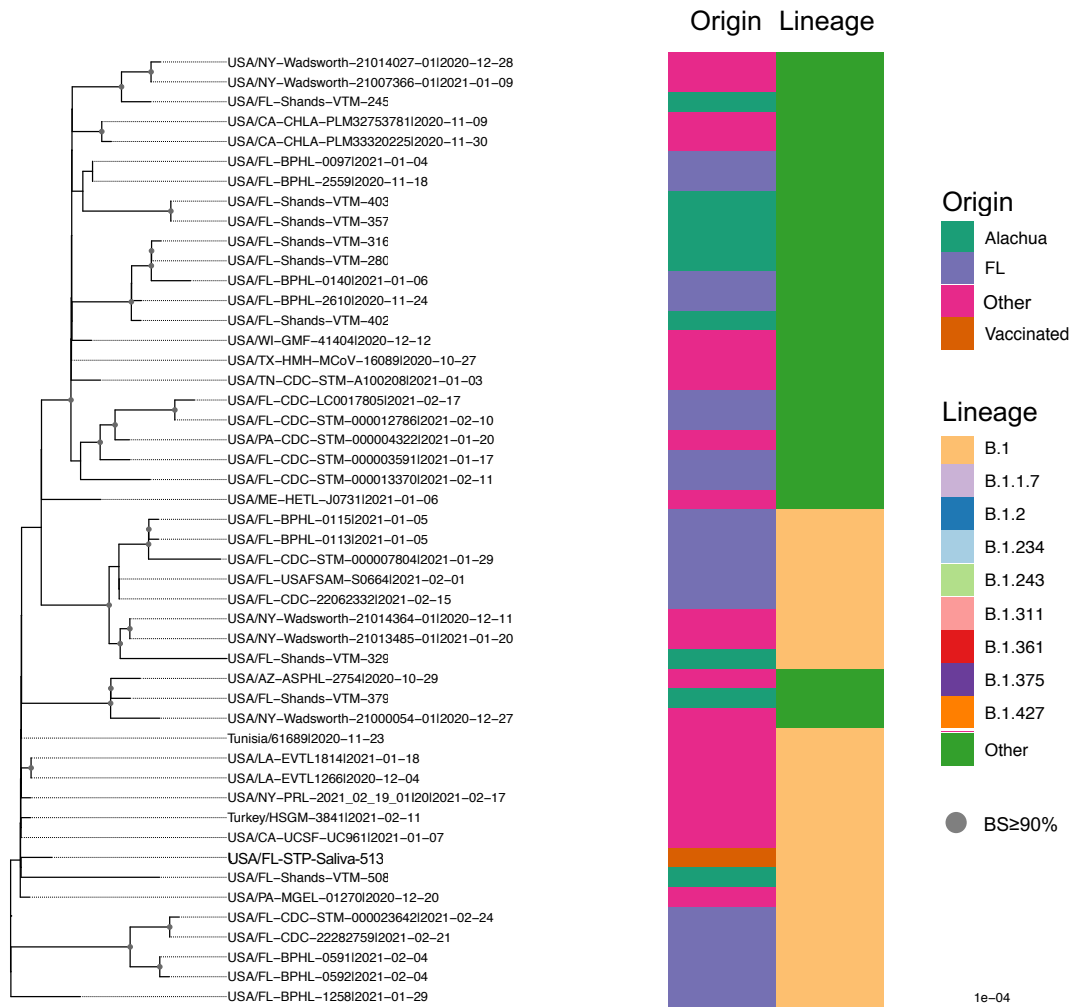

451

452 **Figure S3. Distribution of identified lineages and geographical origin within a fragment of the**  
 453 **phylogenetic tree containing FL-Shands-VTM-513 (B.1 lineage).** Branches shown are scaled in genetic  
 454 substitutions/site. Nodes with  $\geq 90\%$  support using bootstrap sampling are indicated by grey dots. This clade  
 455 is not well-supported but represents a fragment of the tree in Figure 1 three nodes back from the FL-STP-  
 456 Saliva-513 taxon. Other lineages represent lineages comprising  $< 1\%$  of the total sample population, though  
 457 in this subtree only B.1.349 and B.1.363 are present.

458

459

## 460 References

- 461 1. Rambaut A, Loman N, Pybus O, Barclay W, Barrett J, Carabelli A, et al. Preliminary genomic  
 462 characterisation of an emergent SARS-CoV-2 lineage in the UK defined by a novel set of spike mutations.  
 463 Virological.org. 2020; [https://virological.org/t/preliminary-genomic-characterisation-of-an-emergent-  
 464 sars-cov-2-lineage-in-the-uk-defined-by-a-novel-set-of-spike-mutations/563](https://virological.org/t/preliminary-genomic-characterisation-of-an-emergent-sars-cov-2-lineage-in-the-uk-defined-by-a-novel-set-of-spike-mutations/563).  
 465 2. Rambaut A, Holmes EC, O'Toole Á, Hill V, McCrone JT, Ruis C, et al. A dynamic nomenclature  
 466 proposal for SARS-CoV-2 lineages to assist genomic epidemiology. Nat Microbiol. 2020;5(11):1403-7.

- 467 3. Larsen B, Worobey M. Phylogenetic evidence that B.1.1.7 has been circulating in the United  
468 States since early- to mid-November. *Virological.org*. 2021([https://virological.org/t/phylogenetic-](https://virological.org/t/phylogenetic-evidence-that-b-1-1-7-has-been-circulating-in-the-united-states-since-early-to-mid-november/598)  
469 [evidence-that-b-1-1-7-has-been-circulating-in-the-united-states-since-early-to-mid-november/598](https://virological.org/t/phylogenetic-evidence-that-b-1-1-7-has-been-circulating-in-the-united-states-since-early-to-mid-november/598)).  
470 4. Zhang W, Davis BD, Chen SS, Sincuir Martinez JM, Plummer JT, Vail E. Emergence of a Novel  
471 SARS-CoV-2 Variant in Southern California. *JAMA*. 2021;325(13):1324-6.  
472 5. Hitchings MDT, Ranzani OT, Scaramuzzini Torres MS, de Oliveira SB, Almiron M, Said R, et al.  
473 Effectiveness of CoronaVac in the setting of high SARS-CoV-2 P.1 variant transmission in Brazil: A test-  
474 negative case-control study. *medRxiv*. 2021:2021.04.07.21255081.  
475 6. Madhi SA, Baillie V, Cutland CL, Voysey M, Koen AL, Fairlie L, et al. Efficacy of the ChAdOx1  
476 nCoV-19 Covid-19 Vaccine against the B.1.351 Variant. *N Engl J Med*. 2021.  
477 7. Buss LF, Prete CA, Abraham CMM, Mendrone A, Salomon T, de Almeida-Neto C, et al. Three-  
478 quarters attack rate of SARS-CoV-2 in the Brazilian Amazon during a largely unmitigated epidemic.  
479 *Science*. 2021;371(6526):288-92.  
480 8. Sabino BD, Alonso FOM, Oliveira MSC, Venceslau MT, Guimarães MAAM, Varella RB. Long-term  
481 intermittent detection of SARS CoV 2 in the upper respiratory tract: what is the meaning of it? *Infect Dis*  
482 (Lond). 2021;53(2):151-3.  
483 9. Polack FP, Thomas SJ, Kitchin N, Absalon J, Gurtman A, Lockhart S, et al. Safety and Efficacy of  
484 the BNT162b2 mRNA Covid-19 Vaccine. *N Engl J Med*. 2020;383(27):2603-15.  
485 10. Alachua County COVID-19 Recovery Dashboard <https://dashboards.alachuacounty.us/COVID19/>  
486 [  
487 11. To KK, Tsang OT, Leung WS, Tam AR, Wu TC, Lung DC, et al. Temporal profiles of viral load in  
488 posterior oropharyngeal saliva samples and serum antibody responses during infection by SARS-CoV-2:  
489 an observational cohort study. *Lancet Infect Dis*. 2020;20(5):565-74.  
490 12. Zhu J, Guo J, Xu Y, Chen X. Viral dynamics of SARS-CoV-2 in saliva from infected patients. *J Infect*.  
491 2020;81(3):e48-e50.  
492 13. Charre C, Ginevra C, Sabatier M, Regue H, Destras G, Brun S, et al. Evaluation of NGS-based  
493 approaches for SARS-CoV-2 whole genome characterisation. *Virus Evol*. 2020;6(2):veaa075.  
494 14. Cevik M, Tate M, Lloyd O, Maraolo AE, Schafers J, Ho A. SARS-CoV-2, SARS-CoV, and MERS-CoV  
495 viral load dynamics, duration of viral shedding, and infectiousness: a systematic review and meta-  
496 analysis. *Lancet Microbe*. 2021;2(1):e13-e22.  
497 15. Giovanetti M, Cella E, Benedetti F, Magalis BR, Fonseca V, Fabris S, et al. SARS-CoV-2 shifting  
498 transmission dynamics and hidden reservoirs limited the efficacy of public health interventions in Italy.  
499 *medRxiv*. 2020:2020.12.16.20248355.  
500 16. Moreno G, Braun K, Larsen B, Alpert T, Worobey M, Grubaugh N, et al. Detection of non-B.1.1.7  
501 Spike Δ69/70 sequences (B.1.375) in the United States. *Virological.org*.  
502 2021 [https://virological.org/t/detection-of-non-b-1-1-7-spike-69-70-sequences-b-1-375-in-the-united-](https://virological.org/t/detection-of-non-b-1-1-7-spike-69-70-sequences-b-1-375-in-the-united-states/587)  
503 [states/587](https://virological.org/t/detection-of-non-b-1-1-7-spike-69-70-sequences-b-1-375-in-the-united-states/587).  
504 17. Minh BQ, Schmidt HA, Chernomor O, Schrempf D, Woodhams MD, von Haeseler A, et al. IQ-  
505 TREE 2: New Models and Efficient Methods for Phylogenetic Inference in the Genomic Era. *Mol Biol Evol*.  
506 2020;37(5):1530-4.  
507 18. Hoang DT, Chernomor O, von Haeseler A, Minh BQ, Vinh LS. UFBoot2: Improving the Ultrafast  
508 Bootstrap Approximation. *Mol Biol Evol*. 2018;35(2):518-22.  
509 19. Minh BQ, Nguyen MA, von Haeseler A. Ultrafast approximation for phylogenetic bootstrap. *Mol*  
510 *Biol Evol*. 2013;30(5):1188-95.  
511 20. Baden LR, El Sahly HM, Essink B, Kotloff K, Frey S, Novak R, et al. Efficacy and Safety of the  
512 mRNA-1273 SARS-CoV-2 Vaccine. *N Engl J Med*. 2021;384(5):403-16.  
513 21. Sadoff J, Le Gars M, Shukarev G, Heerwegh D, Truyers C, de Groot AM, et al. Interim Results of a  
514 Phase 1-2a Trial of Ad26.COVS.2 Covid-19 Vaccine. *N Engl J Med*. 2021.

515 22. Greaney AJ, Loes AN, Crawford KHD, Starr TN, Malone KD, Chu HY, et al. Comprehensive  
516 mapping of mutations in the SARS-CoV-2 receptor-binding domain that affect recognition by polyclonal  
517 human plasma antibodies. *Cell Host Microbe*. 2021;29(3):463-76.e6.

518 23. Suryadevara N, Shrihari S, Gilchuk P, VanBlargan LA, Binshtein E, Zost SJ, et al. Neutralizing and  
519 protective human monoclonal antibodies recognizing the N-terminal domain of the SARS-CoV-2 spike  
520 protein. *Cell*. 2021.

521 24. Ostrov D. Structural consequences of variation in SARS-CoV-2 B.1.1. *Scientific Archives*.  
522 2021;3(2):103-8.

523 25. Wu K, Werner AP, Koch M, Choi A, Narayanan E, Stewart-Jones GBE, et al. Serum Neutralizing  
524 Activity Elicited by mRNA-1273 Vaccine. *N Engl J Med*. 2021.

525 26. Wang P, Nair MS, Liu L, Iketani S, Luo Y, Guo Y, et al. Antibody resistance of SARS-CoV-2 variants  
526 B.1.351 and B.1.1.7. *Nature*. 2021.

527 27. Kustin T, Harel N, Finkel U, Perchik S, Harari S, Tahor M, et al. Evidence for increased  
528 breakthrough rates of SARS-CoV-2 variants of concern in BNT162b2 mRNA vaccinated individuals.  
529 *medRxiv*. 2021:2021.04.06.21254882.

530 28. Altschul SF, Gish W, Miller W, Myers EW, Lipman DJ. Basic local alignment search tool. *J Mol*  
531 *Biol*. 1990;215(3):403-10.

532 29. Moshiri N. *ViralMSA: Massively scalable reference-guided multiple sequence alignment of viral*  
533 *genomes*. *Bioinformatics*. 2020.

534 30. Lednicky JA, Lauzardo M, Fan ZH, Jutla A, Tilly TB, Gangwar M, et al. Viable SARS-CoV-2 in the air  
535 of a hospital room with COVID-19 patients. *Int J Infect Dis*. 2020;100:476-82.

536 31. Lednicky JA, Cherabuddi K, Tagliamonte MS, Elbadry MA, Subramaniam K, Waltzek TB, et al. In-  
537 Frame 12-Nucleotide Deletion within Open Reading Frame 3a in a SARS-CoV-2 Strain Isolated from a  
538 Patient Hospitalized with COVID-19. *Microbiol Resour Announc*. 2021;10(8).

539 32. Carbone M, Lednicky J, Xiao SY, Venditti M, Bucci E. Coronavirus 2019 Infectious Disease  
540 Epidemic: Where We Are, What Can Be Done and Hope For. *J Thorac Oncol*. 2021;16(4):546-71.

541 33. Lednicky JA, Lauzardo M, Alam MM, Elbadry MA, Stephenson CJ, Gibson JC, et al. Isolation of  
542 SARS-CoV-2 from the air in a car driven by a COVID patient with mild illness. *Int J Infect Dis*. 2021.

543 34. CDC. CDC real-time reverse transcriptase PCR (rRT-PCR) diagnostic test for COVID-19  
544 <https://www.cdc.gov/coronavirus/2019-ncov/lab/virus-requests.html> [

545
